# Supplementary material for: Genome-Wide Analysis of SQUAMOSA-Promoter-Binding Protein-like Family in Flowering Pleioblastus pygmaeus
Source: MDPI journal article supplement (doi:10.3390/ijms232214035), 2022-11-14
Supplement: s1 [file s1]

**Supplemental Table S1. Physicochemical properties of *SPL* family members in *Pleuroblastus pygmaeus***

| Name    | AA   | Molecular weight | Theoretical PI | Instability Index | Aliphatic Index | GRAVY  | Rice Ortholog | Subcellular Location |
|---------|------|------------------|----------------|-------------------|-----------------|--------|---------------|----------------------|
| PpSPL1  | 979  | 106995.9         | 5.35           | 51.38             | 80.17           | -0.268 | OsSPL6        | nucleus              |
| PpSPL2  | 448  | 48414.05         | 9.19           | 50.00             | 58.15           | -0.576 | OsSPL3        | nucleus              |
| PpSPL3  | 329  | 35159.27         | 8.78           | 67.67             | 55.99           | -0.388 | OsSPL19       | nucleus              |
| PpSPL4  | 370  | 39553.16         | 9.02           | 52.42             | 58.70           | -0.481 | OsSPL2        | nucleus              |
| PpSPL5  | 416  | 44078.82         | 8.46           | 62.13             | 65.58           | -0.319 | OsSPL5        | nucleus              |
| PpSPL6  | 463  | 50228.16         | 9.36           | 54.87             | 52.85           | -0.649 | OsSPL12       | nucleus              |
| PpSPL7  | 843  | 92946.38         | 5.66           | 53.42             | 80.06           | -0.326 | OsSPL9        | nucleus              |
| PpSPL8  | 464  | 50333.25         | 9.28           | 51.73             | 57.11           | -0.572 | OsSPL12       | nucleus              |
| PpSPL9  | 949  | 103439.99        | 5.85           | 53.98             | 78.10           | -0.259 | OsSPL6        | nucleus              |
| PpSPL10 | 567  | 62541.62         | 8.06           | 56.54             | 66.44           | -0.550 | OsSPL9        | nucleus              |
| PpSPL11 | 184  | 20144.74         | 9.75           | 72.36             | 54.78           | -0.520 | OsSPL19       | nucleus              |
| PpSPL12 | 400  | 42448.41         | 7.57           | 61.82             | 60.33           | -0.422 | OsSPL16       | nucleus              |
| PpSPL13 | 415  | 44347.85         | 7.13           | 59.72             | 65.37           | -0.332 | OsSPL18       | nucleus              |
| PpSPL14 | 383  | 39973.23         | 8.56           | 48.08             | 54.41           | -0.518 | OsSPL17       | nucleus              |
| PpSPL15 | 424  | 45024.57         | 8.21           | 55.99             | 65.61           | -0.292 | OsSPL18       | nucleus              |
| PpSPL16 | 381  | 39723.15         | 8.97           | 50.93             | 59.29           | -0.426 | OsSPL17       | nucleus              |
| PpSPL17 | 389  | 41255.68         | 10.83          | 62.04             | 68.53           | -0.478 | OsSPL7        | nucleus              |
| PpSPL18 | 308  | 33922.14         | 9.38           | 49.27             | 54.74           | -0.587 | OsSPL3        | nucleus              |
| PpSPL19 | 366  | 39517.98         | 8.53           | 50.12             | 59.56           | -0.545 | OsSPL2        | nucleus              |
| PpSPL20 | 875  | 97381.59         | 6.42           | 54.73             | 81.70           | -0.323 | OsSPL1        | nucleus              |
| PpSPL21 | 360  | 41021.97         | 8.15           | 58.50             | 80.97           | -0.430 | OsSPL9        | nucleus              |
| PpSPL22 | 587  | 64786.33         | 5.80           | 57.09             | 75.30           | -0.420 | OsSPL9        | nucleus              |
| PpSPL23 | 513  | 55999.47         | 8.52           | 56.90             | 56.69           | -0.553 | OsSPL3        | nucleus              |
| PpSPL24 | 272  | 29489.13         | 9.73           | 51.66             | 53.35           | -0.659 | OsSPL12       | nucleus              |
| PpSPL25 | 365  | 39236.18         | 9.52           | 65.24             | 76.14           | -0.475 | OsSPL15       | nucleus              |
| PpSPL26 | 154  | 17009.18         | 9.82           | 66.86             | 47.60           | -0.871 | OsSPL4        | nucleus              |
| PpSPL27 | 523  | 57339.02         | 5.66           | 56.83             | 75.39           | -0.415 | OsSPL9        | nucleus              |
| PpSPL28 | 1117 | 122036.59        | 7.17           | 55.05             | 79.12           | -0.433 | OsSPL15       | nucleus              |
