# Supplementary material for: Genome-Wide Analysis of SQUAMOSA-Promoter-Binding Protein-like Family in Flowering Pleioblastus pygmaeus
Source: MDPI journal article supplement (doi:10.3390/ijms232214035), 2022-11-14
Supplement: s1 [file s1]

Supplemental Table S2. Ka, Ks and Ka/Ks values of orthologous *SPL* pairs from *Oryza sativa*,  
*Phyllostachys edulis* and *Pleioblastus pygmaeus*

| Gene pairs             | Ka       | Ks       | Ka/Ks    |
|------------------------|----------|----------|----------|
| <i>OsSPL10/PhSPL11</i> | 0.189115 | 0.429814 | 0.439993 |
| <i>OsSPL10/PhSPL22</i> | 0.310584 | 0.589351 | 0.526992 |
| <i>OsSPL10/PhSPL28</i> | 0.337446 | 0.581801 | 0.580002 |
| <i>OsSPL10/PhSPL7</i>  | 0.178123 | 0.462982 | 0.384729 |
| <i>OsSPL11/PhSPL10</i> | 0.19817  | 0.361607 | 0.548024 |
| <i>OsSPL11/PhSPL23</i> | 0.289396 | 0.637511 | 0.453947 |
| <i>OsSPL11/PhSPL6</i>  | 0.220306 | 0.402241 | 0.547698 |
| <i>OsSPL12/PhSPL5</i>  | 0.124281 | 0.461611 | 0.269234 |
| <i>OsSPL12/PhSPL9</i>  | 0.120461 | 0.470187 | 0.256199 |
| <i>OsSPL13/PhSPL13</i> | 0.148304 | 0.376684 | 0.393708 |
| <i>OsSPL14/PhSPL17</i> | 0.133094 | 0.49812  | 0.267193 |
| <i>OsSPL14/PhSPL2</i>  | 0.198941 | 0.73791  | 0.2696   |
| <i>OsSPL14/PhSPL25</i> | 0.216985 | 0.776747 | 0.279352 |
| <i>OsSPL14/PhSPL32</i> | 0.131273 | 0.458091 | 0.286565 |
| <i>OsSPL15/PhSPL15</i> | 0.078459 | 0.394493 | 0.198885 |
| <i>OsSPL15/PhSPL31</i> | 0.070986 | 0.39816  | 0.178286 |
| <i>OsSPL16/PhSPL14</i> | 0.157409 | 0.658266 | 0.239126 |
| <i>OsSPL16/PhSPL26</i> | 0.198221 | 0.926001 | 0.214061 |
| <i>OsSPL16/PhSPL3</i>  | 0.192471 | 0.888647 | 0.216589 |
| <i>OsSPL16/PhSPL33</i> | 0.142452 | 0.639965 | 0.222593 |
| <i>OsSPL17/PhSPL17</i> | 0.193229 | 0.562141 | 0.343738 |
| <i>OsSPL17/PhSPL2</i>  | 0.143193 | 0.500009 | 0.286381 |
| <i>OsSPL17/PhSPL25</i> | 0.150747 | 0.366073 | 0.411796 |
| <i>OsSPL17/PhSPL32</i> | 0.190733 | 0.593586 | 0.321323 |
| <i>OsSPL18/PhSPL26</i> | 0.128262 | 0.478881 | 0.267836 |
| <i>OsSPL18/PhSPL3</i>  | 0.127651 | 0.492258 | 0.259317 |
| <i>OsSPL1/PhSPL19</i>  | 0.129339 | 0.427635 | 0.302452 |
| <i>OsSPL2/PhSPL14</i>  | 0.520758 | 1.092358 | 0.476729 |
| <i>OsSPL2/PhSPL18</i>  | 0.102029 | 0.444038 | 0.229775 |
| <i>OsSPL2/PhSPL21</i>  | 0.129179 | 0.451001 | 0.286428 |
| <i>OsSPL3/PhSPL24</i>  | 0.150172 | 0.382302 | 0.392809 |
| <i>OsSPL3/PhSPL27</i>  | 0.137817 | 0.357067 | 0.38597  |
| <i>OsSPL3/PhSPL5</i>   | 0.236836 | 0.698734 | 0.338951 |
| <i>OsSPL3/PhSPL9</i>   | 0.23413  | 0.736227 | 0.318014 |
| <i>OsSPL4/PhSPL10</i>  | 0.245127 | 0.705713 | 0.347346 |

| Gene pairs             | Ka       | Ks       | Ka/Ks    |
|------------------------|----------|----------|----------|
| <i>OsSPL4/PhSPL23</i>  | 0.185356 | 0.478486 | 0.38738  |
| <i>OsSPL4/PhSPL29</i>  | 0.156228 | 0.545566 | 0.286359 |
| <i>OsSPL4/PhSPL6</i>   | 0.264047 | 0.804568 | 0.328185 |
| <i>OsSPL5/PhSPL22</i>  | 0.20395  | 0.455852 | 0.447404 |
| <i>OsSPL5/PhSPL28</i>  | 0.227532 | 0.471747 | 0.482318 |
| <i>OsSPL6/PhSPL20</i>  | 0.083561 | 0.349112 | 0.239352 |
| <i>OsSPL6/PhSPL30</i>  | 0.0851   | 0.360257 | 0.236221 |
| <i>OsSPL7/PhSPL34</i>  | 0.191434 | 0.398326 | 0.480595 |
| <i>OsSPL8/PhSPL35</i>  | 0.067842 | 0.494638 | 0.137154 |
| <i>OsSPL9/PhSPL12</i>  | 0.119254 | 0.428499 | 0.278306 |
| <i>OsSPL9/PhSPL8</i>   | 0.096709 | 0.400207 | 0.241648 |
| <i>PpSPL10/OsSPL9</i>  | 0.142974 | 0.517649 | 0.276199 |
| <i>PpSPL12/OsSPL16</i> | 0.162088 | 0.710093 | 0.228264 |
| <i>PpSPL12/OsSPL18</i> | 0.184215 | 0.826997 | 0.222752 |
| <i>PpSPL12/OsSPL2</i>  | 0.528759 | 0.948517 | 0.557458 |
| <i>PpSPL13/OsSPL16</i> | 0.193584 | 0.927805 | 0.208648 |
| <i>PpSPL13/OsSPL18</i> | 0.122613 | 0.4813   | 0.254754 |
| <i>PpSPL14/OsSPL14</i> | 0.302285 | 0.909865 | 0.332231 |
| <i>PpSPL14/OsSPL17</i> | 0.229664 | 0.476703 | 0.481777 |
| <i>PpSPL15/OsSPL16</i> | 0.191222 | 0.872196 | 0.219242 |
| <i>PpSPL15/OsSPL18</i> | 0.126528 | 0.5028   | 0.251647 |
| <i>PpSPL16/OsSPL14</i> | 0.215419 | 0.772302 | 0.278931 |
| <i>PpSPL16/OsSPL17</i> | 0.143546 | 0.47328  | 0.303301 |
| <i>PpSPL17/OsSPL7</i>  | 0.261931 | 0.470729 | 0.556437 |
| <i>PpSPL18/OsSPL3</i>  | 0.175649 | 0.491868 | 0.357106 |
| <i>PpSPL19/OsSPL2</i>  | 0.123629 | 0.449843 | 0.274826 |
| <i>PpSPL1/OsSPL6</i>   | 0.088038 | 0.359624 | 0.244806 |
| <i>PpSPL20/OsSPL1</i>  | 0.132407 | 0.438966 | 0.301634 |
| <i>PpSPL21/OsSPL9</i>  | 0.078819 | 0.428807 | 0.183811 |
| <i>PpSPL22/OsSPL9</i>  | 0.116519 | 0.490255 | 0.23767  |
| <i>PpSPL23/OsSPL3</i>  | 0.147463 | 0.404496 | 0.364559 |
| <i>PpSPL25/OsSPL15</i> | 0.151034 | 0.526516 | 0.286855 |
| <i>PpSPL26/OsSPL4</i>  | 0.282957 | 0.893586 | 0.316653 |
| <i>PpSPL27/OsSPL9</i>  | 0.093675 | 0.445328 | 0.21035  |
| <i>PpSPL28/OsSPL15</i> | 0.072001 | 0.39616  | 0.181746 |
| <i>PpSPL2/OsSPL3</i>   | 0.135902 | 0.366335 | 0.370978 |
| <i>PpSPL4/OsSPL2</i>   | 0.119057 | 0.46719  | 0.254836 |

| Gene pairs             | Ka       | Ks       | Ka/Ks    |
|------------------------|----------|----------|----------|
| <i>PpSPL5/OsSPL10</i>  | 0.316753 | 0.590254 | 0.536637 |
| <i>PpSPL5/OsSPL5</i>   | 0.217194 | 0.489321 | 0.443867 |
| <i>PpSPL6/OsSPL12</i>  | 0.125319 | 0.481129 | 0.260469 |
| <i>PpSPL7/OsSPL9</i>   | 0.095892 | 0.382904 | 0.250432 |
| <i>PpSPL8/OsSPL12</i>  | 0.112472 | 0.457174 | 0.246015 |
| <i>PpSPL9/OsSPL6</i>   | 0.084111 | 0.375258 | 0.224142 |
| <i>PpSPL10/PhSPL12</i> | 0.07039  | 0.147603 | 0.476886 |
| <i>PpSPL10/PhSPL8</i>  | 0.097133 | 0.253632 | 0.382967 |
| <i>PpSPL11/PhSPL1</i>  | 0.090354 | 0.332282 | 0.27192  |
| <i>PpSPL11/PhSPL16</i> | 0.077678 | 0.123594 | 0.628492 |
| <i>PpSPL12/PhSPL14</i> | 0.027742 | 0.116722 | 0.237673 |
| <i>PpSPL12/PhSPL26</i> | 0.14103  | 0.627896 | 0.224606 |
| <i>PpSPL12/PhSPL3</i>  | 0.1381   | 0.693772 | 0.199057 |
| <i>PpSPL12/PhSPL33</i> | 0.006633 | 0.017357 | 0.38215  |
| <i>PpSPL13/PhSPL14</i> | 0.148453 | 0.669777 | 0.221645 |
| <i>PpSPL13/PhSPL21</i> | 0.461623 | 1.142068 | 0.404199 |
| <i>PpSPL13/PhSPL26</i> | 0.005328 | 0.033732 | 0.157939 |
| <i>PpSPL13/PhSPL3</i>  | 0.030884 | 0.215463 | 0.14334  |
| <i>PpSPL13/PhSPL33</i> | 0.133355 | 0.643041 | 0.207381 |
| <i>PpSPL14/PhSPL17</i> | 0.269884 | 0.641128 | 0.420951 |
| <i>PpSPL14/PhSPL2</i>  | 0.158638 | 0.294494 | 0.538679 |
| <i>PpSPL14/PhSPL25</i> | 0.121865 | 0.164005 | 0.743055 |
| <i>PpSPL14/PhSPL32</i> | 0.277    | 0.606324 | 0.456852 |
| <i>PpSPL15/PhSPL14</i> | 0.158304 | 0.684572 | 0.231245 |
| <i>PpSPL15/PhSPL21</i> | 0.440904 | 1.161871 | 0.379478 |
| <i>PpSPL15/PhSPL26</i> | 0.032139 | 0.157674 | 0.203833 |
| <i>PpSPL15/PhSPL3</i>  | 0.009551 | 0.023028 | 0.414749 |
| <i>PpSPL15/PhSPL33</i> | 0.123589 | 0.636257 | 0.194243 |
| <i>PpSPL16/PhSPL17</i> | 0.174118 | 0.565439 | 0.307935 |
| <i>PpSPL16/PhSPL2</i>  | 0.011846 | 0.040327 | 0.293752 |
| <i>PpSPL16/PhSPL25</i> | 0.050949 | 0.141969 | 0.358876 |
| <i>PpSPL16/PhSPL32</i> | 0.181521 | 0.529748 | 0.342655 |
| <i>PpSPL17/PhSPL34</i> | 0.196159 | 0.380376 | 0.515697 |
| <i>PpSPL17/PhSPL37</i> | 0.165992 | 0.269549 | 0.615813 |
| <i>PpSPL18/PhSPL24</i> | 0.109172 | 0.22937  | 0.475964 |
| <i>PpSPL18/PhSPL27</i> | 0.076365 | 0.108009 | 0.707028 |
| <i>PpSPL18/PhSPL5</i>  | 0.216495 | 0.778206 | 0.278198 |

| Gene pairs             | Ka       | Ks       | Ka/Ks    |
|------------------------|----------|----------|----------|
| <i>PpSPL18/PhSPL9</i>  | 0.198514 | 0.75695  | 0.262255 |
| <i>PpSPL19/PhSPL18</i> | 0.042098 | 0.206038 | 0.204319 |
| <i>PpSPL19/PhSPL21</i> | 0.013326 | 0.046677 | 0.285483 |
| <i>PpSPL1/PhSPL20</i>  | 0.013991 | 0.03265  | 0.428517 |
| <i>PpSPL1/PhSPL30</i>  | 0.043537 | 0.151338 | 0.28768  |
| <i>PpSPL20/PhSPL19</i> | 0.0127   | 0.021128 | 0.60107  |
| <i>PpSPL21/PhSPL12</i> | 0.049435 | 0.156697 | 0.31548  |
| <i>PpSPL21/PhSPL8</i>  | 0.037481 | 0.094675 | 0.395893 |
| <i>PpSPL22/PhSPL12</i> | 0.038689 | 0.082736 | 0.467621 |
| <i>PpSPL22/PhSPL8</i>  | 0.069638 | 0.202818 | 0.343351 |
| <i>PpSPL23/PhSPL24</i> | 0.009295 | 0.02038  | 0.45607  |
| <i>PpSPL23/PhSPL27</i> | 0.048639 | 0.168474 | 0.288701 |
| <i>PpSPL23/PhSPL5</i>  | 0.201802 | 0.637444 | 0.316579 |
| <i>PpSPL23/PhSPL9</i>  | 0.189386 | 0.644778 | 0.293722 |
| <i>PpSPL24/PhSPL24</i> | 0.220794 | 0.70295  | 0.314096 |
| <i>PpSPL24/PhSPL27</i> | 0.22605  | 0.721958 | 0.313107 |
| <i>PpSPL24/PhSPL5</i>  | 0.059336 | 0.120193 | 0.49367  |
| <i>PpSPL24/PhSPL9</i>  | 0.074727 | 0.178133 | 0.419504 |
| <i>PpSPL25/PhSPL15</i> | 0.091276 | 0.125924 | 0.724852 |
| <i>PpSPL25/PhSPL31</i> | 0.093767 | 0.253718 | 0.369572 |
| <i>PpSPL26/PhSPL23</i> | 0.19434  | 0.482431 | 0.402835 |
| <i>PpSPL26/PhSPL29</i> | 0.1945   | 0.192802 | 1.008803 |
| <i>PpSPL26/PhSPL6</i>  | 0.272237 | 1.023698 | 0.265935 |
| <i>PpSPL27/PhSPL12</i> | 0.06322  | 0.205168 | 0.308139 |
| <i>PpSPL27/PhSPL8</i>  | 0.036854 | 0.067406 | 0.546742 |
| <i>PpSPL28/PhSPL15</i> | 0.035173 | 0.118265 | 0.297406 |
| <i>PpSPL28/PhSPL31</i> | 0.008096 | 0.031066 | 0.260593 |
| <i>PpSPL2/PhSPL24</i>  | 0.05187  | 0.172549 | 0.300612 |
| <i>PpSPL2/PhSPL27</i>  | 0.011691 | 0.033018 | 0.354095 |
| <i>PpSPL2/PhSPL5</i>   | 0.181297 | 0.638563 | 0.283914 |
| <i>PpSPL2/PhSPL9</i>   | 0.178062 | 0.622518 | 0.286036 |
| <i>PpSPL3/PhSPL1</i>   | 0.049257 | 0.216106 | 0.227928 |
| <i>PpSPL3/PhSPL16</i>  | 0.061571 | 0.104837 | 0.587299 |
| <i>PpSPL4/PhSPL18</i>  | 0.011133 | 0.0342   | 0.325531 |
| <i>PpSPL4/PhSPL21</i>  | 0.042701 | 0.155621 | 0.274389 |
| <i>PpSPL4/PhSPL3</i>   | 0.490928 | 0.986482 | 0.497655 |
| <i>PpSPL5/PhSPL11</i>  | 0.25113  | 0.55881  | 0.449401 |

| Gene pairs            | Ka       | Ks       | Ka/Ks    |
|-----------------------|----------|----------|----------|
| <i>PpSPL5/PhSPL22</i> | 0.009046 | 0.039097 | 0.231374 |
| <i>PpSPL5/PhSPL28</i> | 0.064902 | 0.113903 | 0.569805 |
| <i>PpSPL5/PhSPL7</i>  | 0.278913 | 0.615453 | 0.453182 |
| <i>PpSPL6/PhSPL24</i> | 0.197297 | 0.59229  | 0.333109 |
| <i>PpSPL6/PhSPL27</i> | 0.186588 | 0.579214 | 0.322139 |
| <i>PpSPL6/PhSPL5</i>  | 0.045223 | 0.12313  | 0.367278 |
| <i>PpSPL6/PhSPL9</i>  | 0.005608 | 0.029114 | 0.192634 |
| <i>PpSPL7/PhSPL12</i> | 0.043297 | 0.156947 | 0.27587  |
| <i>PpSPL7/PhSPL8</i>  | 0.010898 | 0.029484 | 0.369628 |
| <i>PpSPL8/PhSPL24</i> | 0.195233 | 0.647657 | 0.301445 |
| <i>PpSPL8/PhSPL27</i> | 0.184119 | 0.619999 | 0.296966 |
| <i>PpSPL8/PhSPL5</i>  | 0.017131 | 0.023368 | 0.733092 |
| <i>PpSPL8/PhSPL9</i>  | 0.035436 | 0.115744 | 0.306156 |
| <i>PpSPL9/PhSPL20</i> | 0.040716 | 0.149962 | 0.271511 |
| <i>PpSPL9/PhSPL30</i> | 0.010663 | 0.0291   | 0.366429 |
