# Supplementary material for: Genome-Wide Analysis of SQUAMOSA-Promoter-Binding Protein-like Family in Flowering Pleioblastus pygmaeus
Source: MDPI journal article supplement (doi:10.3390/ijms232214035), 2022-11-14
Supplement: s1 [file s1]

Supplemental Table S3. Primer list of reference gene and *PpSPLs* in *Pleioblastus pygmaeus*

| Gene Abbreviation | Forward primers          | Reverse primers          | Rice orthologlocus |
|-------------------|--------------------------|--------------------------|--------------------|
| <i>TUB</i>        | TGACATTGAGCGCCCAACTTACA  | ATCCACATTCAGAGCACCATCGA  | Os03g0726100       |
| <i>PpSPL5</i>     | GCGAGGAGCAGCAGCACTTC     | GATACCGACGAGCACGACAAGATG | NM_001409348       |
| <i>PpSPL13</i>    | GTCCAGCCAACCGAGCACATC    | GGGAGCAAGCAAACCAGGAAGAG  | XM_015755388       |
| <i>PpSPL14</i>    | GCAACTACCTGGCGGCAAGC     | CGTGATGAACTGAGCCTGGATGG  | XM_015755476       |
|                   |                          |                          | XM_006660710       |
| <i>PpSPL16</i>    | CAGTTCACCACGGTCAGTTCTCAG | GCTCGACTTGCGGCGGATTC     | XM_015755476       |
|                   |                          |                          | XM_006660710       |
| <i>PpSPL17</i>    | GGGCTCGCTTCGCTTTGCTG     | CGGCTGCTGCTGCTGTAAGTAC   | XM_015779858       |
| <i>PpSPL21</i>    | ACACGCTGCTGCTGTCATGC     | TGTGCCGCTCCAACTTTCTTCTAC | XM_015784566       |
| <i>PpSPL25</i>    | CTTCCGTGGCTTCTTCACCTTCTC | GGTAGCTCCGCATCCGTTTCC    | XM_015794435       |
| <i>PpSPL27</i>    | ACACGCTGCTGCTGTCATGC     | TGTGCCGCTCCAACTTTCTTCTAC | XM_015784566       |
